# Supplementary material for: Dental team barriers and enablers for the dental management of adults with severe obesity: a qualitative analysis
Source: Research Square preprint supplement (doi:10.21203/rs.3.rs-4969593/v1), 2024-09-25
Supplement: Supplementary file 1 [file cda2c5798d8aa17cd7e5d979.docx]

| **Participant characteristics** | **N = 34 (%)** |
| --- | --- |
| Female | 27 (79.4) |
| *Role* | |
| General dentist | 10 (29.4) |
| Oral Health Therapist | 5 (14.7) |
| Specialist Special Needs Dentistry | 8 (23.5) |
| Dental assistant | 9 (26.5) |
| Dental receptionist | 2 (5.9) |
| *Employment type* | |
| Public | 23 (67.6) |
| Private | 3 (8.8) |
| Mixed | 8 (23.5) |
| *Self-reported lived experience with obesity* | |
| Yes | 10 (29.4) |

Table 1: Demographics of participants by gender, role, employment type and lived experience with obesity

Table 2: Excerpts related to *clinical challenges in the provision of dental care for people living with severe obesity by clinicians and support staff*

| Emerging Theme | Excerpt Number | Excerpt |
| --- | --- | --- |
| Ergonomics and positioning | 2.1  2.2  2.3 | “The one thing that you do get with the DOs and the DAs have it as well is during a procedure with a morbidly obese patient is getting in the right position and then they finish it and then backs really hurting, or their neck or their shoulders. Same when you've been in theatre and dealing with an obese person and yeah strange angles” *(Dental assistant)*  **“**sometimes I find it really difficult to work with to and to actually position yourself correctly and things like that, and it is really difficult. Retracting cheeks, tongues, everything like that is really, really difficult.” *(Dental assistant)*  “I sometimes find it quite hard with positioning to get into their mouth, especially if it's like at the at the back of their mouth, like their back teeth. You kind of feel like you're actually on top of them. And I try not touch them because you feel bad…it's kind of like you’re just on the chest area…I don't want them to see me avoiding it. But at the same time, I don't want to just be like resting on them because I feel like that's a bit insensitive as well… And actually physically leaning on them, It's…I mean, some people don't mind but it can be confronting” *(Dental assistant)* |
| Treatment provision barriers – time, transfers, dental chair failures, appointment scheduling | 2.4  2.5  2.6 | “we have to take more frequent kind of stops just to help with breathing and (they) couldn't be like reclined fully in the dental chair as well…as it was too uncomfortable…as well really tight cheeks. So it was really hard to get access towards molar regions…It is difficult… having frequent stops obviously is individualised to the patient, but it is a little bit difficult to try to get the treatment done in the time frame” *(General dentist)*  “getting them in and out of the chair…if they're really obese, the chair doesn't move as well. And there's been times where the chair got stuck” *(General dentist)*  “It’s quite difficult to arrange, so I think it took me a good maybe week or might have even been close to two to arrange this appointment to occur for this lady *(Dental receptionist)* |
| Burden of dental disease | 2.7 | “they haven't been able to go to the dentist or the general dentist, so they've neglected their oral healthcare for so long that by the time they present to myself that they're in a state that could have easily been prevented had they come a bit sooner” *(SND specialist)* |
| Challenges in alternate dental settings –RACFs, theatre environments | 2.8  2.9 | “obesity is a huge headache when we take patients into theatre, the anaesthetic risks really escalate quite quickly for the obese patient and once again, certainly having a morbidly obese patient brings logistic challenges in the theatre for OH&S…can they get into a day stay unit or do they need to be admitted? I think the logistics of treating patients are becoming more onerous and this hospital in a state of what is it? 6 million people have got one bariatric chair in the whole hospital…so we've really got to identify that there is a need.” *(SND specialist)*  “wheelchairs being large and not being accessible to, you know, doors, doorways, etc. So similar experience in residential aged care facilities where they are confined to large princess chairs and to make access a bit more convenient…they often get residents needing dental care to the hairdresser's room or to another office where they all can come instead of us having to pack and unpack the mobile dental unit. But again, if they can't get through the door of the hairdresser or the office room, then again we have to make that additional effort to go to their rooms where they are there. So that's an additional barrier”*(SND specialist)* |
| Weight assessment, discussions or triaging challenges | 2.10  2.11 | “we're told that we should ask questions in regards to weight to determine if they need a certain room set up, etc… I find that very difficult to ask personally over the phone, especially if you don't have a rapport with that person” *(Dental receptionist)*  “once…because they were really overweight…I had to check that the chair was suitable for this patient. And oh my God, I was like so nervous it probably took me like 5 minutes of standing outside to be like how do I…I talked myself into…I just feel uncomfortable asking “How much do you weigh?” *(General dentist)* |
| Dental disease preventive discussions impacted by weight stigma | 2.12 | “I think from a more like emotional perspective, it's harder maybe sometimes when you're explaining what needs to occur and they're feeling a little bit, maybe more judgement when I'm discussing medical, when I'm discussing diet, when I'm discussing toothbrushing things like that, I think they sometimes have a concern that maybe they're being judged not only for their oral health but for their overall health…because people assume that they have a hole in their tooth. They assume that it's been because of sugary foods and that then it's linked with obesity” *(Oral health therapist)* |

Table 3: Excerpts related to the in*appropriateness of current bariatric dental service delivery*

| Emerging Theme | Excerpt Number | Excerpt |
| --- | --- | --- |
| Inappropriate referrals | 3.1 | “We can have a laugh now at some of the referrals, because I think one of the referrals I received at when I was at the Oral Health Centre was someone, you know, considered a bariatric patient and therefore referred to the oral health centre. And then when I actually saw the patient, the person was actually edentulous and all the work had been done and (I was) thinking what a waste. So I had to definitely, I mean, call up the person who had referred and talk to them saying you've done all the work and the person is actually edentulous. I mean, why can’t you do pros(thodontic) work in the chair or wherever the person attends to. So I think that would be the classic wrong or inappropriate referral” *(SND specialist)* |
| Specialist vs general settings for bariatric dental care | 3.2  3.3 | “it starts to raise the philosophical question about is that where the care of people of patients with obesity needs to be? within specialized services or why shouldn't they be able to access more general services…is this really a reliance that you know when you get to a certain weight or a certain BMI all of a sudden you can no longer receive any aspect of general dental care that you can't go to a private practice, you can't go to a community dental clinic, to receive the care that you need and automatically you need to be referred to a specialist unit. And then to sit on a, you know, extended wait list to be able to even get general aspects of your care” *(SND specialist)*  “well in public I’ve experienced it a lot more. In private, I didn't really experience obesity. I didn't really see a lot of patients that way because they didn't have bariatric chair so that wasn't even a question” *(Oral health therapist)* |
| Inadequate facilities in specialist SND departments | 3.4  3.5  3.6 | “A gentleman that was referred from (a general dental clinic), he had an emergency extraction by sitting across three chairs in the waiting room after hours. And then he was referred to us because we are a specialty unit and because he had mobility issues, he couldn't physically get into the bariatric room. The door wasn't able to open wide enough to accommodate his mobility device!” *(SND specialist)*  “As a specialty…maybe we're an area that is more equipped to be able to manage these patients than elsewhere? I think that that's a hard generalization for us to make cause often even within our specialized units is that we don't necessarily have the facilities, the equipment, you know the access that's necessary” *(SND specialist)*  “And even our own specialty special needs department has a broken bariatric chair that is very difficult to fix because it's from the UK. And so now we need to use the IV sedation one…the lack of support services or equipment makes it difficult for us to provide good service…we need to e-mail the other department to see if that chair is free, and then we need to bring all of our dental equipment down into another department and considering we’re the referral service for all bariatric patients, I feel like it just really doesn't do them justice” *(SND specialist)* |
| Rationale for referrals or lack of awareness of referral pathways | 3.7  3.8  3.9  3.10 | “I guess with dental treatment I would be looking to maybe contact Westmead or Sydney Dental Hospital who have yeah more equipment and services available and specialists available and maybe going that way or speaking with my line managers and finding out what their suggestion would be if our equipment wasn't suitable” *(General dentist)*  “I often forget that that could be something that I would refer to a Special Needs Dentist, I often think a Special Needs Dentist might need to manage our patients that have physical disabilities, intellectual disabilities, and I forget that that is something that they might manage. Often I just think I'll just book that with any dentist as long as it's in that chair. And I forget that there's someone who may do that better…Because you don't think of it as a disability…I guess they do have lots of other medical conditions sometimes as well, that do link in. So having a more complex medical issue, having a specialist is important” *(Oral health therapist)*  “if there was some reason why I couldn't proceed as normal or provide optimal care I’d refer if it's really complex and I'm worried about encountering something that will be out of my scope, if they're at risk of a medical emergency or something in the chair due to their weight and medical conditions…But if I had a patient who was overweight and I was able to provide the care as I normally would, I wouldn't automatically think to refer them to a special needs dentist if they are happy to see a general practitioner” (*General dentist)*  “But in private practice, definitely a bit more challenging because… if the patient was over that (chair weight), it would be hard to…I wouldn't know where to refer the patient if they weren't eligible for public treatment…to be honest” (*General dentist)* |

Table 4: Excerpts related to *safety of dental care*

| Emerging Theme | Excerpt Number | Excerpt |
| --- | --- | --- |
| Medical risk with dental procedures for those living with obesity | 4.1  4.2 | “We've been fortunate in not having any encounters, but …when we used to have the DIACO platform (bariatric chair), I used to always worry about what would happen if patients needed, advanced life support (laughs) because the bariatric platform really does not support any… compressions or weight… you know, if we were going to do CPR and to quickly lower them or to lie them on their sides like that? …we just really haven't had training as to what we would do if the situation arose. But the IV Sedation Department, which has the other bariatric chair I think is a safer place for our patients, if they did need a emergency management because it’s…, located with all the equipment that's for…CPR and for yeah life support. And there is often other sedationists around who could help out and nurses who are all trained in emergency management. And the chair itself is a lot more… anchored to the floor…it's a lot more sturdy too to help us manage” *(SND specialist)*  “I feel fairly equipped. I mean, I don't know if it would differ. I mean, the only thing would be like the airway, but I don’t think my management would differ in any medical emergency” *(General dentist)* |
| Treatment planning modifications for patient safety | 4.3  4.4  4.5 | “I guess you know other comorbidities is one of the big factors to consider, but I think it's the airway management which is the main risk for these patients. So sometimes it might be that their general anaesthetic risk is too high that we have to consider potentially other options to provide treatment for these patients. But you know such as IV sedation or inhalation sedation or something like that instead, but even that in itself will have other risks, and that's where… really being involved with the patient's medical team and actually other specialists involved to provide the safe planning for these patients is really, really important. So It's not something that you can just go, Yep, that's fine straight to general anaesthetic. All those risk factors that we have to keep into consideration for these patients” *(SND specialist)*  “I guess for GA a lot more of them need overnight admissions due to higher risk” *(SND specialist)*  “to ensure that they are medically optimised before we undergo surgical procedures, for example, because that will affect wound healing…we refer them back to their GP and form that link to you know manage some of those medical comorbidities before we plan for sort of surgical procedure” *(SND specialist)* |
| Physical environment accommodations | 4.6 | “It's not just the surgery themselves, it's the waiting room, it's our toilet facilities. I don't know if one of the toilets outside is, but inside we have a wheelchair accessible toilet. I don't think the others are…in the waiting room, they would struggle to sit on the seats that we have and are those seats strong enough for somebody who's morbidly obese to sit on?…Just thinking about our building – the parking isn’t ideal for many disabled patients/obese patients at once. And then the ramp getting up to the clinic would be quite tricky for a lot of obese patients. And a lot of our doorways, they are not very wide at all. We need big doorways” *(Oral health therapist)* |
| Private vs public and safety considerations | 4.7 | “in private practice that I'm working in at the moment…things to think about is how close to the nearest hospital … particularly for patients that maybe…there's extra precautions or you know, it might be more difficult for them to get into the ambulance … I feel in my current setting that that's something that I would not be very well equipped to deal with…and the other issue we talked about before, the bariatric chairs at least that are close to me are all in public settings as well” *(SND specialist)* |
| Weight assessment for safe dental treatment | 4.8 | “main thing that I can think of is just when it did come to their weight specifically, knowing whether it would be safe to treat them in the, you know, in a certain chair” *(General dentist)* |

*Table 5:* Excerpts related to *enablers to access for people living with severe obesity*

| Emerging Theme | Excerpt Number | Excerpt |
| --- | --- | --- |
| Physical environment/appropriateness of available facilities in all dental settings | 5.1  5.2  5.3  5.4  5.5  5.6  5.7 | “we have Yerin, that's a culturally appropriate place for our indigenous patients to be seen. So why don't we have a clinic that's more appropriate for our management of our patients with obesity?” *(Oral health therapist)*  “we've got the ramp that leads into the clinic…quite a wide waiting room. We've got wide hallways leading through to the from the waiting area to the patient room. And then the room itself is very, quite spacious, which is extremely important…and that's the reason that we can't treat in the other rooms because there's just not sufficient space in half of the rooms here. So that's 100% integral for the patient, but also for transportation using the hoist, wheelchair…and then obviously just having the right chair to be able to manage” *(General dentist)*  “wheelchair tipper, I think is a great facility to have. And very beneficial not just for patients with obesity, but for patients with physical disabilities as well that can't transfer to the dental chair” *(SND specialist)*  “…having individual cubicles. I think from a patient point of view having that dignity and respect to kind of … have their own area, not have those big open cubicles that you sometimes see in the general clinics. I think that's something (for) … future planning for a clinic” *(SND specialist)*  “I think we're quite equipped to managing patients with obesity because we do have the bariatric chair and then we also have access to special needs dental specialist” *(General dentist)*  “I think in terms of the private sector, you can't exclude somebody just because they're obese. There has to be accommodation in some of the private specialist practices to identify these urgencies” *(SND specialist)*  “having a bariatric chair is not the answer…I think also there needs to be some training of staff that are actually seeing patients there as well because it's reasonably high frequency of injuries to staff. They don't receive any formal training. They just told to get on with it... And you know you don't want to get to a point where they say we don't want to see those patients because I got injured last time. That's a real concern” *(General dentist)* |
| Education of patients and the entire dental team and for guideline development | 5.8  5.9  5.10 | “there's a need to advocate more broadly within our profession and outside our profession…for example, in the medical sphere, raising awareness … making them aware of the referral pathways …. and patients that we see” *(SND specialist)*  “I think if you're going to have a guideline about the dental management of obese patients, you'd …want kind of the practical access discussion that we've had and the medical management. … such as protocols when it comes to medical emergencies… so that all clinical settings just have a really effective way to safely manage …obese patients” *(General dentist)*  “physical environment, physical access, OHS, safety, that's one. I think the medical considerations of the consequences of obesity... and also the psychosocial elements… would be very helpful” *(SND specialist)* |
